# Supplementary material
Source: PubMed Central journal article supplement (PMC539996)

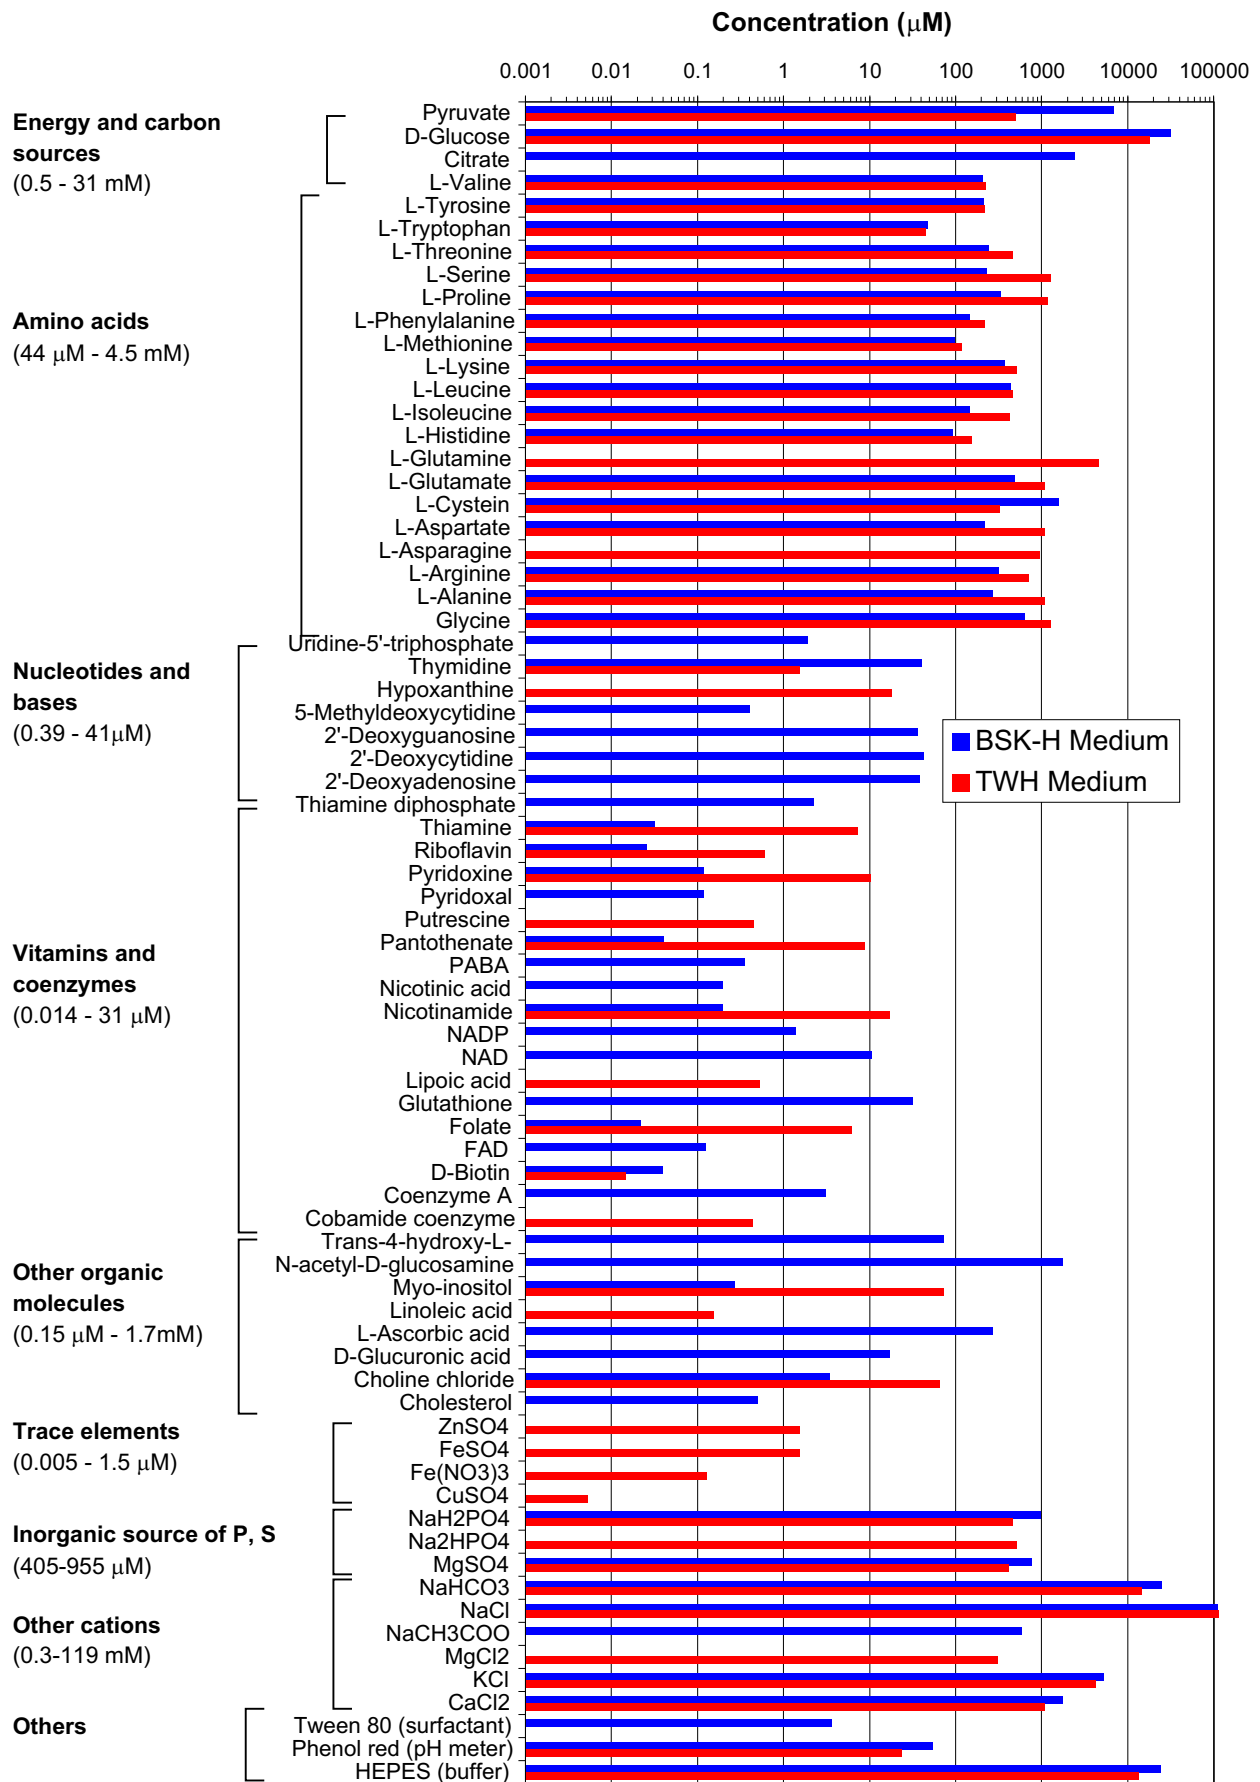

Supplement: nar_33_suppl-1_D321__1.pdf [file nar_33_suppl-1_D321__1.pdf]
